# Supplementary material for: Genome-wide identification and expression analysis of NADPH oxidase genes in response to ABA and abiotic stresses, and in fibre formation in Gossypium
Source: PeerJ. 2020 Jan 17;8:e8404. doi: 10.7717/peerj.8404 (PMC6970565; doi:10.7717/peerj.8404)
Supplement: Supplemental Information 2 [file peerj-08-8404-s002.xlsx]

## Sheet: Sheet1
Sequence similarity between AtRbohs and Rbohs from G. arboretum
query id	subject id	% identity	alignment length	mismatches	gap opens	q. start	q. end	s. start	s. end	evalue	bit score
RbohA	Cotton_A_16216_BGI-A2_v1.0	64.013	892	293	11	25	902	42	919	0	1150
RbohA	Cotton_A_07974_BGI-A2_v1.0	61.998	921	306	13	5	902	16	915	0	1146
RbohA	Cotton_A_03631_BGI-A2_v1.0	63.892	889	290	11	31	902	33	907	0	1133
RbohB	Cotton_A_29320_BGI-A2_v1.0	69.626	856	226	9	14	843	37	884	0	1236
RbohB	Cotton_A_33534_BGI-A2_v1.0	61.111	864	285	13	22	843	62	916	0	1087
RbohB	Cotton_A_13752_BGI-A2_v1.0	61.53	863	275	11	29	843	80	933	0	1087
RbohC	Cotton_A_03631_BGI-A2_v1.0	68.75	912	242	10	20	905	13	907	0	1280
RbohC	Cotton_A_07974_BGI-A2_v1.0	68.514	902	254	8	20	905	28	915	0	1279
RbohC	Cotton_A_16216_BGI-A2_v1.0	66.45	924	262	14	12	905	14	919	0	1252
RbohD	Cotton_A_13752_BGI-A2_v1.0	74.332	935	201	10	18	921	7	933	0	1398
RbohD	Cotton_A_33534_BGI-A2_v1.0	73.758	926	205	15	18	921	7	916	0	1392
RbohD	Cotton_A_18772_BGI-A2_v1.0	77.179	872	180	7	62	921	8	872	0	1375
RbohE	Cotton_A_05673_BGI-A2_v1.0	60.832	1034	276	18	7	952	23	1015	0	1221
RbohE	Cotton_A_38536_BGI-A2_v1.0	55.471	923	365	12	52	952	31	929	0	1023
RbohE	Cotton_A_31123_BGI-A2_v1.0	51.249	921	359	15	51	952	22	871	0	903
RbohF	Cotton_A_38536_BGI-A2_v1.0	78.858	946	164	9	9	944	10	929	0	1509
RbohF	Cotton_A_31123_BGI-A2_v1.0	66.805	964	207	10	1	944	1	871	0	1286
RbohF	Cotton_A_05673_BGI-A2_v1.0	52.302	1021	362	15	14	944	30	1015	0	1013
RbohG	Cotton_A_13752_BGI-A2_v1.0	66.581	781	243	7	80	849	160	933	0	1090
RbohG	Cotton_A_07974_BGI-A2_v1.0	60.568	880	298	13	6	849	49	915	0	1086
RbohG	Cotton_A_33534_BGI-A2_v1.0	65.107	791	255	9	71	849	135	916	0	1085
RbohH	Cotton_A_24667_BGI-A2_v1.0	59.213	890	323	13	8	886	13	873	0	1090
RbohH	Cotton_A_38536_BGI-A2_v1.0	51.311	801	359	8	96	886	150	929	0	835
RbohH	Cotton_A_29320_BGI-A2_v1.0	50.939	799	349	13	96	886	121	884	0	822
RbohI	Cotton_A_38536_BGI-A2_v1.0	60.252	951	331	14	9	941	8	929	0	1102
RbohI	Cotton_A_31123_BGI-A2_v1.0	55.472	932	319	15	30	941	16	871	0	983
RbohI	Cotton_A_29320_BGI-A2_v1.0	56.234	802	296	13	157	941	121	884	0	880
RbohJ	Cotton_A_24667_BGI-A2_v1.0	57.734	918	316	11	10	912	13	873	0	1094
RbohJ	Cotton_A_38536_BGI-A2_v1.0	46.608	914	445	13	10	912	48	929	0	825
RbohJ	Cotton_A_29320_BGI-A2_v1.0	47.174	867	395	17	57	912	70	884	0	800
Sequence similarity between Rbohs of G. arboretum and AtRboh
Cotton_A_03631	RbohC	68.75	912	242	10	13	907	20	905	0	1284
Cotton_A_03631	RbohD	66.017	924	265	14	3	907	28	921	0	1217
Cotton_A_03631	RbohA	63.892	889	290	11	33	907	31	902	0	1132
Cotton_A_05673	RbohE	61.607	1008	266	17	41	1015	33	952	0	1206
Cotton_A_05673	RbohF	52.498	1021	360	16	30	1015	14	944	0	1023
Cotton_A_05673	RbohD	47.634	972	379	18	54	1015	70	921	0	853
Cotton_A_07974	RbohC	68.514	902	254	8	28	915	20	905	0	1285
Cotton_A_07974	RbohD	65.222	923	271	15	16	915	26	921	0	1221
Cotton_A_07974	RbohA	62.76	913	312	12	16	915	5	902	0	1145
Cotton_A_13344	RbohF	46.61	826	380	12	22	803	136	944	0	737
Cotton_A_13344	RbohB	45.875	800	374	13	46	803	61	843	0	716
Cotton_A_13344	RbohD	44.898	833	410	13	4	803	105	921	0	712
Cotton_A_13752	RbohD	74.359	936	199	11	7	933	18	921	0	1408
Cotton_A_13752	RbohC	67.297	899	255	12	52	933	29	905	0	1237
Cotton_A_13752	RbohA	63.004	892	307	10	57	933	19	902	0	1130
Cotton_A_16216	RbohC	66.45	924	262	14	14	919	12	905	0	1252
Cotton_A_16216	RbohD	64.967	922	281	13	15	919	25	921	0	1203
Cotton_A_16216	RbohA	64.013	892	293	11	42	919	25	902	0	1140
Cotton_A_18772	RbohD	77.408	872	178	8	8	872	62	921	0	1392
Cotton_A_18772	RbohC	67.571	885	258	10	3	872	35	905	0	1249
Cotton_A_18772	RbohA	63.442	889	294	11	5	872	24	902	0	1142
Cotton_A_23171	RbohF	82.505	543	88	2	304	846	409	944	0	966
Cotton_A_23171	RbohF	70.37	324	64	8	11	306	10	329	1.77e-136	421
Cotton_A_23171	RbohI	68.498	546	169	1	304	846	396	941	0	798
Cotton_A_24667	RbohH	58.989	890	325	12	13	873	8	886	0	1087
Cotton_A_24667	RbohJ	57.734	918	316	11	13	873	10	912	0	1067
Cotton_A_24667	RbohF	50.475	842	364	9	49	873	139	944	0	857
Cotton_A_29320	RbohB	69.626	856	226	9	37	884	14	843	0	1224
Cotton_A_29320	RbohD	64.835	910	269	15	12	884	26	921	0	1202
Cotton_A_29320	RbohC	62.403	899	299	14	18	884	14	905	0	1155
Cotton_A_31123	RbohF	66.805	964	207	10	1	871	1	944	0	1286
Cotton_A_31123	RbohI	61.021	803	263	10	99	871	159	941	0	962
Cotton_A_31123	RbohE	51.425	912	353	14	31	871	60	952	0	886
Cotton_A_33534	RbohD	73.542	926	207	14	7	916	18	921	0	1381
Cotton_A_33534	RbohC	69.089	867	231	13	72	916	54	905	0	1234
Cotton_A_33534	RbohA	64.245	867	287	9	68	916	41	902	0	1118
Cotton_A_38536	RbohF	78.858	946	164	9	10	929	9	944	0	1534
Cotton_A_38536	RbohI	59.496	953	335	14	8	929	9	941	0	1086
Cotton_A_38536	RbohE	55.738	915	359	12	39	929	60	952	0	1009
Sequence similarity between AtRbohs and Rbohs from G. raimondii
RbohA	Gorai.009G273400.1	63.087	894	298	11	19	902	59	930	0	1142
RbohA	Gorai.003G117900.1	63.901	892	294	11	25	902	42	919	0	1140
RbohA	Gorai.001G053300.1	63.464	895	296	11	25	902	27	907	0	1124
RbohB	Gorai.007G299500.1	69.825	855	224	9	15	843	38	884	0	1238
RbohB	Gorai.009G273400.1	60.137	873	291	12	18	843	68	930	0	1079
RbohB	Gorai.009G202500.1	60.739	866	280	10	29	843	80	936	0	1077
RbohC	Gorai.001G053300.1	67.982	912	249	11	20	905	13	907	0	1253
RbohC	Gorai.003G117900.1	67.07	908	257	12	22	905	30	919	0	1250
RbohC	Gorai.009G273400.1	67.077	893	262	11	29	905	54	930	0	1244
RbohD	Gorai.009G273400.1	75.241	933	193	11	18	921	7	930	0	1421
RbohD	Gorai.009G202500.1	73.561	938	206	10	18	921	7	936	0	1387
RbohD	Gorai.001G053300.1	66.775	924	258	16	28	921	3	907	0	1225
RbohE	Gorai.001G017400.1	65.489	962	275	15	7	952	23	943	0	1264
RbohE	Gorai.003G085100.1	55.471	923	365	12	52	952	31	929	0	1026
RbohE	Gorai.008G250500.1	55.446	909	370	12	60	952	39	928	0	1017
RbohF	Gorai.003G085100.1	78.858	946	164	9	9	944	10	929	0	1508
RbohF	Gorai.008G250500.1	78.118	946	168	10	10	944	11	928	0	1506
RbohF	Gorai.004G137300.1	74.947	946	191	11	10	944	11	921	0	1439
RbohG	Gorai.009G202500.1	66.071	784	245	7	80	849	160	936	0	1087
RbohG	Gorai.009G273400.1	65.083	779	257	7	80	849	158	930	0	1081
RbohG	Gorai.001G053300.1	63.557	804	261	7	71	849	111	907	0	1065
RbohH	Gorai.001G106500.1	56.292	890	317	13	8	886	13	841	0	1023
RbohH	Gorai.008G250500.1	50.805	807	356	9	96	886	147	928	0	837
RbohH	Gorai.003G085100.1	51.186	801	360	8	96	886	150	929	0	833
RbohI	Gorai.008G250500.1	59.579	950	338	12	9	941	8	928	0	1112
RbohI	Gorai.003G085100.1	60.147	951	332	14	9	941	8	929	0	1102
RbohI	Gorai.004G137300.1	58.693	949	341	12	9	941	8	921	0	1094
RbohJ	Gorai.001G106500.1	55.229	918	307	11	10	912	13	841	0	1026
RbohJ	Gorai.008G250500.1	50.549	819	366	9	101	912	142	928	0	828
RbohJ	Gorai.003G085100.1	46.718	914	444	13	10	912	48	929	0	827
Sequence similarity between Rbohs of G. raimondii and AtRboh
Gorai.001G017400	RbohE	66.774	936	262	14	41	943	33	952	0	1249
Gorai.001G017400	RbohF	56.481	949	360	13	30	943	14	944	0	1064
Gorai.001G017400	RbohD	51.556	900	378	15	54	943	70	921	0	892
Gorai.001G053300	RbohC	67.982	912	249	11	13	907	20	905	0	1258
Gorai.001G053300	RbohD	66.234	924	263	14	3	907	28	921	0	1218
Gorai.001G053300	RbohA	63.352	895	297	11	27	907	25	902	0	1123
Gorai.001G106500	RbohH	56.292	890	317	13	13	841	8	886	0	1021
Gorai.001G106500	RbohJ	55.338	918	306	12	13	841	10	912	0	999
Gorai.001G106500	RbohF	50.501	798	325	9	93	841	168	944	0	811
Gorai.002G128200	RbohD	73.753	762	168	13	7	752	18	763	0	1137
Gorai.002G128200	RbohC	67.564	706	197	10	72	757	54	747	0	983
Gorai.002G128200	RbohA	63.083	707	243	7	68	760	41	743	0	890
Gorai.003G085100	RbohF	78.858	946	164	9	10	929	9	944	0	1533
Gorai.003G085100	RbohI	59.391	953	336	14	8	929	9	941	0	1086
Gorai.003G085100	RbohE	55.738	915	359	12	39	929	60	952	0	1012
Gorai.003G117900	RbohC	67.07	908	257	12	30	919	22	905	0	1250
Gorai.003G117900	RbohD	64.751	922	283	13	15	919	25	921	0	1201
Gorai.003G117900	RbohA	63.901	892	294	11	42	919	25	902	0	1131
Gorai.004G137300	RbohF	74.947	946	191	11	11	921	10	944	0	1449
Gorai.004G137300	RbohI	58.377	949	344	12	8	921	9	941	0	1065
Gorai.004G137300	RbohE	55.289	917	359	13	32	921	60	952	0	987
Gorai.007G299500	RbohB	69.825	855	224	9	38	884	15	843	0	1224
Gorai.007G299500	RbohD	64.835	910	269	15	12	884	26	921	0	1202
Gorai.007G299500	RbohC	61.846	899	304	14	18	884	14	905	0	1146
Gorai.008G199100	RbohF	46.08	829	389	11	18	802	130	944	0	731
Gorai.008G199100	RbohB	46.338	792	360	14	55	802	73	843	0	712
Gorai.008G199100	RbohD	46.242	785	374	11	51	802	152	921	0	709
Gorai.008G212100	RbohC	67.808	876	252	8	31	892	20	879	0	1221
Gorai.008G212100	RbohD	64.581	895	267	14	19	890	26	893	0	1165
Gorai.008G212100	RbohA	61.591	880	310	12	19	885	5	869	0	1077
Gorai.008G250500	RbohF	78.647	946	163	10	11	928	10	944	0	1524
Gorai.008G250500	RbohI	59.158	950	342	11	8	928	9	941	0	1088
Gorai.008G250500	RbohE	55.12	918	359	11	39	928	60	952	0	1005
Gorai.009G202500	RbohD	73.667	938	205	11	7	936	18	921	0	1395
Gorai.009G202500	RbohC	68.506	870	240	11	83	936	54	905	0	1233
Gorai.009G202500	RbohA	62.444	892	315	10	57	936	19	902	0	1118
Gorai.009G273400	RbohD	75.348	933	192	11	7	930	18	921	0	1429
Gorai.009G273400	RbohC	67.077	893	262	11	54	930	29	905	0	1252
Gorai.009G273400	RbohA	63.087	894	298	11	59	930	19	902	0	1137
